# Supplementary material
Source: MDPI journal article supplement (https://www.mdpi.com/2072-4292/10/8/1303)
Supplement: s1 [file s1]

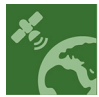

## Supplementary Tables

Table 1. Dates, times, and locations of described UAV flights

| Date      | Site          | Land Use             | Times<br>(EDT) | Latitude<br>(°) | Longitude<br>(°) | Altitude above<br>Ground<br>(m) | Canopy |
|-----------|---------------|----------------------|----------------|-----------------|------------------|---------------------------------|--------|
| 7/27/2016 | Tully, NY     | Mixed<br>Hardwood    | 11:10-12:10    | 42.77728        | -76.08168        | 83                              | 60     |
| 7/27/2016 | Tully, NY     | Mixed<br>Hardwood    | 12:18-12:28    | 42.77728        | -76.08168        | 83                              | 60     |
| 7/27/2016 | Tully, NY     | Mixed<br>Hardwood    | 13:04-13:14    | 42.77728        | -76.08168        | 83                              | 60     |
| 7/27/2016 | Tully, NY     | Mixed<br>Hardwood    | 14:10-14:20    | 42.77728        | -76.08168        | 83                              | 60     |
| 7/27/2016 | Tully, NY     | Mixed<br>Hardwood    | 15:08-15:18    | 42.77728        | -76.08168        | 83                              | 60     |
| 7/30/2017 | Tully, NY     | Mixed<br>Hardwood    | 13:40-13:52    | 42.77613        | -76.08541        | 31                              | 8      |
| 7/30/2017 | Tully, NY     | Mixed<br>Hardwood    | 14:00-14:11    | 42.77605        | -76.08573        | 31                              | 8      |
| 7/30/2017 | Tully, NY     | Spruce<br>Plantation | 14:36-14:46    | 42.77728        | -76.08168        | 24                              | 1      |
| 7/30/2017 | Tully, NY     | Spruce<br>Plantation | 15:09-15:20    | 42.77112        | -76.08297        | 37                              | 14     |
| 7/31/2017 | Geneva,<br>NY | Cropped<br>Willow    | 12:43-12:52    | 42.88322        | -77.00353        | 8                               | 5      |
| 7/31/2017 | Geneva,<br>NY | Cropped<br>Willow    | 13:02-13:13    | 42.88310        | -77.00320        | 9                               | 6      |
| 7/31/2017 | Geneva,<br>NY | Cropped<br>Willow    | 13:29-13:40    | 42.88312        | -77.00378        | 8                               | 5      |

Table 2. Latitude and Longitude of the northwest corner of each of the 500\*500m satellite pixels retrieved for comparison to UAV estimates of albedo at Tully, NY. Satellite data retrieved using the LPDAAC APPEARS tool and latitude and longitude of MODIS pixels retrieved using the MODLAND Pixel Calculator.

| Latitude | Longitude |
|----------|-----------|
| 42.77729 | -76.08656 |
| 42.77729 | -76.08044 |
| 42.77282 | -76.08656 |
| 42.77282 | -76.08044 |

Table 3. Latitude and Longitude of the northwest corner of each of the 500\*500m satellite pixels retrieved for comparison to tower estimates of albedo at Petersham, MA; Bartlett, NH; and Durham, NH.

| Tower site        | Latitude | Longitude |
|-------------------|----------|-----------|
| Petersham, MA USA | 42.53919 | -72.17566 |
| Bartlett, NH USA  | 44.06875 | -71.29669 |
| Durham, NH USA    | 43.11042 | -70.95806 |

Table 4. Blue sky albedo estimates for sites in Tully, NY; Durham, NH; Bartlett, NH; and Petersham, MA. Estimates were created with high (0.5), low (0.1) and typical (0.2) estimates for optical depth to examine the sensitivity of the results to the assumption of 0.2.

| Site | OD | Mean | SE |
|------|----|------|----|
|------|----|------|----|

|           |      |       |       |
|-----------|------|-------|-------|
| Tully     | Low  | 0.152 | 0.001 |
| Tully     | Med  | 0.152 | 0.001 |
| Tully     | High | 0.151 | 0.001 |
| Bartlett  | Low  | 0.148 | 0.002 |
| Bartlett  | Med  | 0.148 | 0.002 |
| Bartlett  | High | 0.147 | 0.002 |
| Durham    | Low  | 0.151 | 0.001 |
| Durham    | Med  | 0.151 | 0.001 |
| Durham    | High | 0.149 | 0.001 |
| Petersham | Low  | 0.146 | 0.002 |
| Petersham | Med  | 0.146 | 0.002 |
| Petersham | High | 0.145 | 0.002 |

Table 5 Current FAA requirements for UAV research within the United States

| Requirement                                                                                                                                                                                                                                                                                                                                                                                                                                                                                                                                                                                                                                                                                                                                                                                                           | Approximate Cost      | Location                                             | Expiration |
|-----------------------------------------------------------------------------------------------------------------------------------------------------------------------------------------------------------------------------------------------------------------------------------------------------------------------------------------------------------------------------------------------------------------------------------------------------------------------------------------------------------------------------------------------------------------------------------------------------------------------------------------------------------------------------------------------------------------------------------------------------------------------------------------------------------------------|-----------------------|------------------------------------------------------|------------|
| Craft Registration                                                                                                                                                                                                                                                                                                                                                                                                                                                                                                                                                                                                                                                                                                                                                                                                    | Registration Fee: \$5 | Form available online                                | 3 years    |
| Pilot Cert. Exam                                                                                                                                                                                                                                                                                                                                                                                                                                                                                                                                                                                                                                                                                                                                                                                                      | Exam Fee: \$150       | One of 700 national test centers                     | 2 years    |
| Pilot Certification                                                                                                                                                                                                                                                                                                                                                                                                                                                                                                                                                                                                                                                                                                                                                                                                   | No Cost               | Form available online<br>Includes security screening | 2 years    |
| <b>Pilot Requirements/Restrictions</b>                                                                                                                                                                                                                                                                                                                                                                                                                                                                                                                                                                                                                                                                                                                                                                                |                       |                                                      |            |
| <ul style="list-style-type: none"> <li>• Be at least 16 years old</li> <li>• Be able to read, speak, write, and understand English (exceptions may be made if the person is unable to meet one of these requirements for a medical reason)</li> <li>• Be in a physical and mental condition to safely operate a small UAV</li> <li>• Pass the aeronautical knowledge exam at an FAA-approved testing center (above)</li> <li>• Undergo Transportation Safety Administration (TSA) security screening (above)</li> </ul>                                                                                                                                                                                                                                                                                               |                       |                                                      |            |
| <b>Equipment Requirements/ Restrictions</b>                                                                                                                                                                                                                                                                                                                                                                                                                                                                                                                                                                                                                                                                                                                                                                           |                       |                                                      |            |
| <ul style="list-style-type: none"> <li>• Unmanned aircraft must weigh less than 25 kgs, including payload, at takeoff</li> <li>• The remote pilot in command must conduct a preflight check of the small UAV to ensure that it is in a condition for safe operation</li> </ul>                                                                                                                                                                                                                                                                                                                                                                                                                                                                                                                                        |                       |                                                      |            |
| <b>Operational Requirements/Restrictions</b>                                                                                                                                                                                                                                                                                                                                                                                                                                                                                                                                                                                                                                                                                                                                                                          |                       |                                                      |            |
| <ul style="list-style-type: none"> <li>• Unmanned aircraft must weigh less than 25 kgs, including payload, at takeoff</li> <li>• Fly in Class G airspace*</li> <li>• Keep the unmanned aircraft within visual line-of-sight; vision must be unaided except by corrective lenses*</li> <li>• Fly at or below 122 m*</li> <li>• Fly during daylight or civil twilight*</li> <li>• Fly at or under 161 kmh*</li> <li>• Yield right of way to manned aircraft*</li> <li>• Do not fly directly over people*</li> <li>• Do not fly from a moving vehicle, unless in a sparsely populated area*</li> <li>• Minimum weather visibility of 4.8 km from operator</li> <li>• Maintain line of sight with UAV at all times</li> <li>• No careless or reckless operations</li> <li>• No carriage of hazardous materials</li> </ul> |                       |                                                      |            |

\*These rules are subject to waiver.

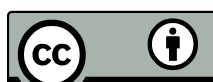

© 2018 by the authors. Submitted for possible open access publication under the terms and conditions of the Creative Commons Attribution (CC BY) license (<http://creativecommons.org/licenses/by/4.0/>).
